# Supplementary material
Source: Springer Nature journal article supplement (https://www.springermedizin.de/resource/supplementary/12906_2010_337_MOESM4_ESM.pdf/9519466)

A Normal Control Abalone

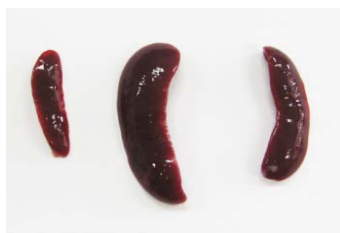

B

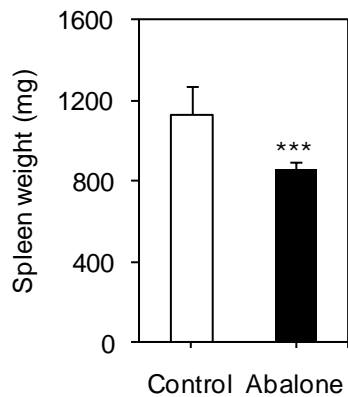

C

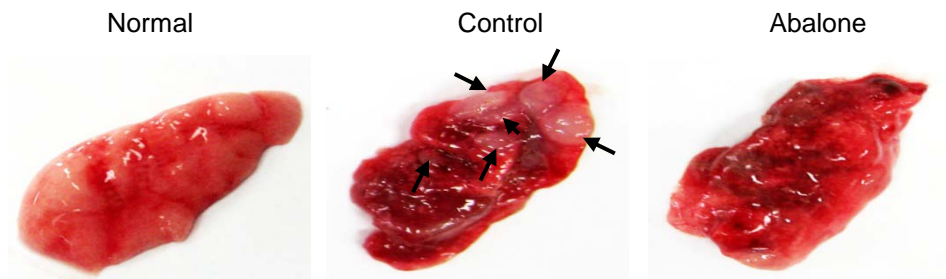

D

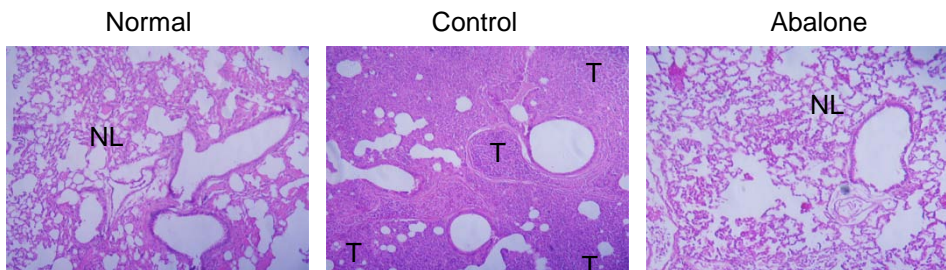

(x200)

Supplement: MOESM4 [file 9519466]
